# Supplementary material for: Comparison of two statistical indicators in communicating epidemiological results to the population: a randomized study in a high environmental risk area of Italy
Source: Springer Nature journal article supplement (doi:10.1186/s12889-019-7003-y), 2019-06-11
Supplement: MOESM2 [file 16797114]

## Questions R1 and R2

Questions R1 and R2 on risk attitude and perception were drawn from the Original 40-Item Domain-Specific Risk-Taking (DOSPERT) Scale 2002 [1, 2]. DOSPERT is a psychometric scale that assesses risk attitude and perception in five content domains: financial decisions, health/safety, recreational, ethical, and social decisions. First, respondents rate the likelihood that they would engage in domain-specific risky activities, then, they rate the perception of the magnitude of the expected risks associated to the same activities. In our questionnaire, we included only the 8 items relative to the health/safety domain. Respondents were requested to rate their likelihood/perception on a 7-point scale ranging from 1 to 7.

### *Question R1*

For each of the following statements, please indicate how risky you perceive each situation.

|            |          |          |            |       |       |           |
|------------|----------|----------|------------|-------|-------|-----------|
| 1          | 2        | 3        | 4          | 5     | 6     | 7         |
| Not at all | Slightly | Somewhat | Moderately | Risky | Very  | Extremely |
| Risky      | Risky    | Risky    | Risky      |       | Risky | Risky     |

### *Question R2*

For each of the following statements, please indicate your likelihood of engaging in each activity or behavior.

|           |            |          |          |          |            |           |
|-----------|------------|----------|----------|----------|------------|-----------|
| 1         | 2          | 3        | 4        | 5        | 6          | 7         |
| Extremely | Moderately | Somewhat | Not Sure | Somewhat | Moderately | Extremely |
| Unlikely  | Unlikely   | Unlikely |          | Likely   | Likely     | Likely    |

1. Buying an illegal drug for your own use.
2. Consuming five or more servings of alcohol in a single evening.
3. Engaging in unprotected sex.
4. Not wearing a seatbelt when being a passenger in the front seat.
5. Not wearing a helmet when riding a motorcycle.
6. Exposing yourself to the sun without using sunscreen.
7. Walking home alone at night in a somewhat unsafe area of town.
8. Regularly eating high cholesterol foods.

## **References**

1. Weber EU, Blais AR, Betz NE. A domain specific risk attitude scale: Measuring risk perceptions and risk behaviors. *J Behav Dec Making*. 2002;15:263-90.
2. Blais AR, Weber EU. A domain-specific risk-taking (DOSPERT) scale for adult populations. *Judgm Decis Mak*. 2006;1:33-47.
