# Supplementary material for: Comparison of two statistical indicators in communicating epidemiological results to the population: a randomized study in a high environmental risk area of Italy
Source: Springer Nature journal article supplement (doi:10.1186/s12889-019-7003-y), 2019-06-11
Supplement: MOESM4 [file 16797114]

Table A1. Description of the sample: socio-demographic characteristics, smoking habit, numerical skills, baseline risk perception and baseline attitude toward risk.

| <b>Variable</b>          |                                                         | <b>Frequency</b> | <b>Percentage</b>         |
|--------------------------|---------------------------------------------------------|------------------|---------------------------|
| <b>Age</b>               | 18-34                                                   | 73               | 21.5                      |
|                          | 35-64                                                   | 165              | 48.5                      |
|                          | >64                                                     | 101              | 29.7                      |
|                          | Missing                                                 | 1                | 0.3                       |
| <b>Gender</b>            | Female                                                  | 168              | 49.4                      |
|                          | Male                                                    | 170              | 50.0                      |
|                          | Missing                                                 | 2                | 0.6                       |
| <b>Education</b>         | Intermediate school diploma or lower                    | 139              | 40.9                      |
|                          | High school diploma                                     | 140              | 41.2                      |
|                          | University degree                                       | 58               | 17.0                      |
|                          | Missing                                                 | 3                | 0.9                       |
| <b>Employment Status</b> | Unoccupied                                              | 89               | 26.2                      |
|                          | Occupied                                                | 147              | 43.2                      |
|                          | Retired                                                 | 100              | 29.4                      |
|                          | Missing                                                 | 4                | 1.2                       |
| <b>Smoking Status</b>    | No Smoker                                               | 192              | 56.4                      |
|                          | Smoker                                                  | 68               | 20.0                      |
|                          | Former Smoker                                           | 74               | 21.8                      |
|                          | Missing                                                 | 6                | 1.8                       |
| <b>Numerical Skills</b>  | At least one right answer                               | 253              | 74.4                      |
|                          | No right answer                                         | 68               | 20.0                      |
|                          | Missing                                                 | 19               | 5.6                       |
|                          |                                                         | <b>Mean</b>      | <b>Standard deviation</b> |
| <b>Risk Attitude</b>     | Scale: 1 (minimum attitude) to 7 (maximum attitude)     | 1.99             | 0.87                      |
|                          | Missing                                                 | -                |                           |
| <b>Risk Perception</b>   | Scale: 1 (minimum perception) to 7 (maximum perception) | 5.92             | 0.86                      |
|                          | Missing                                                 | -                |                           |
