# Supplementary material for: Comparison of two statistical indicators in communicating epidemiological results to the population: a randomized study in a high environmental risk area of Italy
Source: Springer Nature journal article supplement (doi:10.1186/s12889-019-7003-y), 2019-06-11
Supplement: MOESM5 [file 16797114]

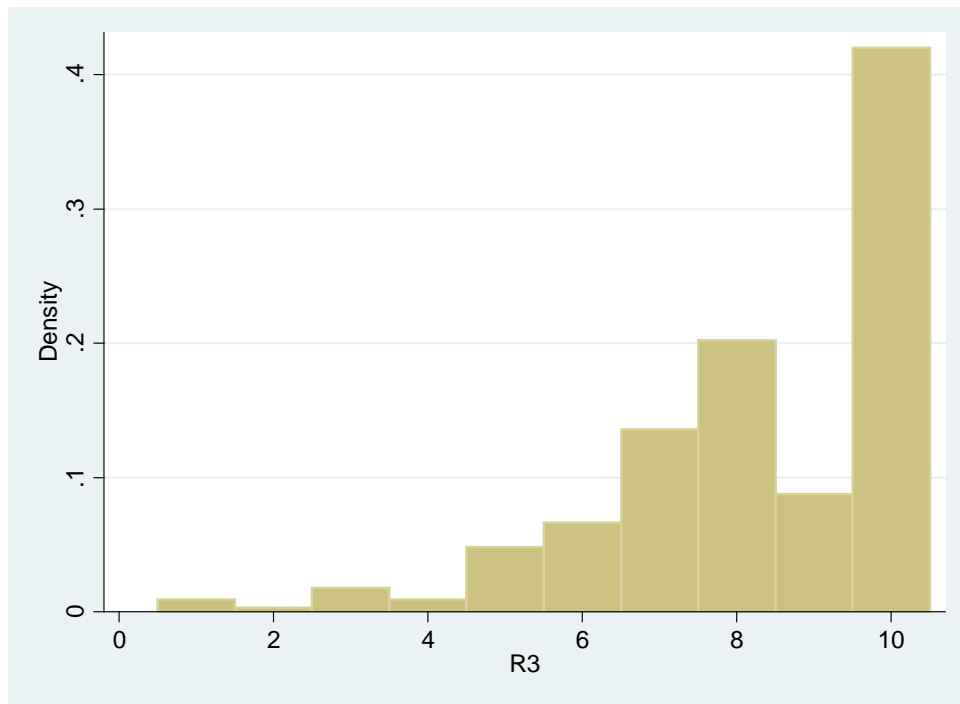

Figure A1. Histogram of the degree of concern of the respondents (question R3).
