# Supplementary material for: Comparison of two statistical indicators in communicating epidemiological results to the population: a randomized study in a high environmental risk area of Italy
Source: Springer Nature journal article supplement (doi:10.1186/s12889-019-7003-y), 2019-06-11
Supplement: MOESM6 [file 16797114]

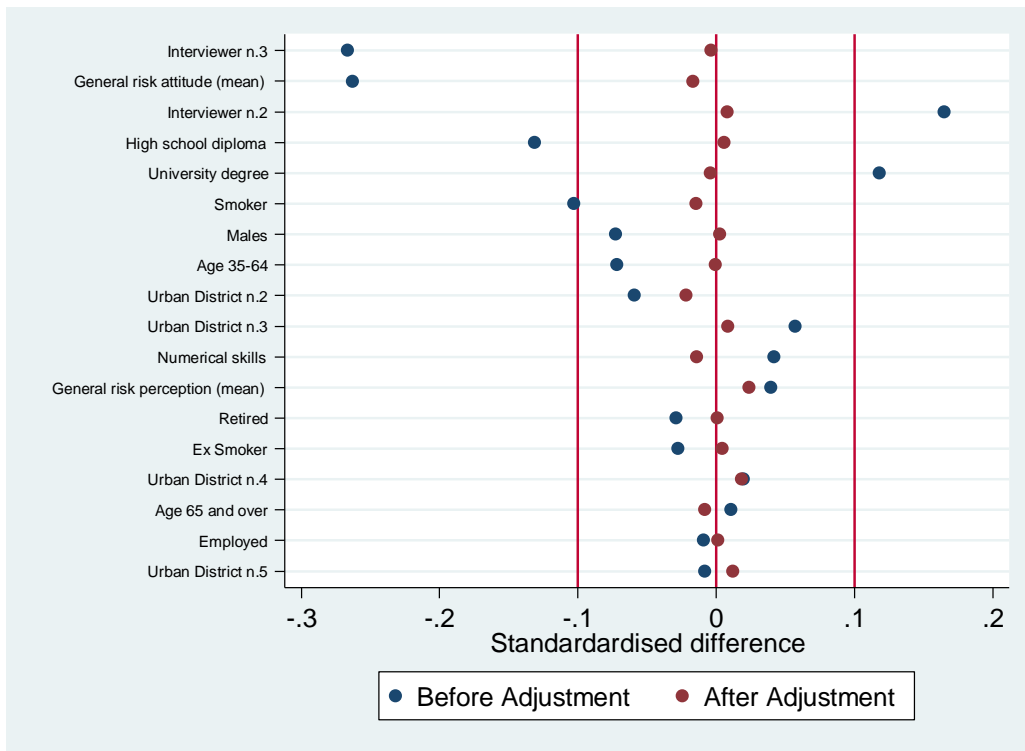

Figure A2. Standardized differences between the two experimental groups for each covariate included in the Propensity Score model, before and after adjustment through IPTW.
