# Supplementary material for: Comparison of two statistical indicators in communicating epidemiological results to the population: a randomized study in a high environmental risk area of Italy
Source: Springer Nature journal article supplement (doi:10.1186/s12889-019-7003-y), 2019-06-11
Supplement: MOESM7 [file 16797114]

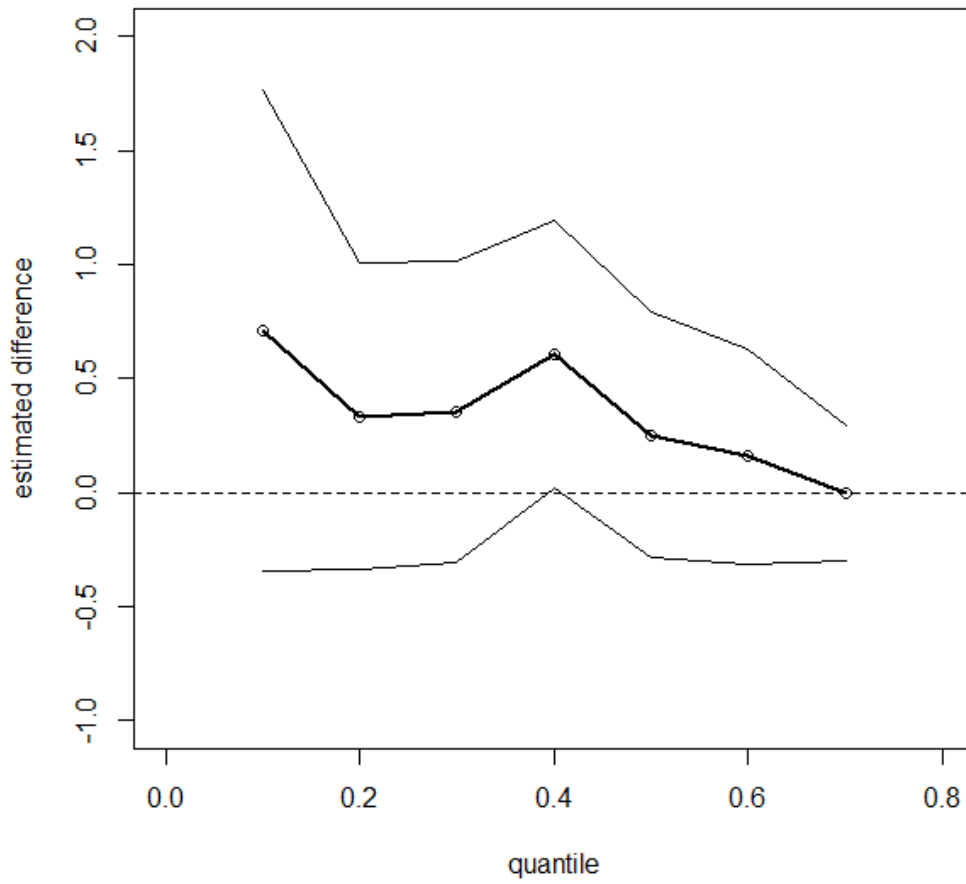

Figure A3. Degree of concern for cancer mortality: estimated differences between TNH and % excess at the quantiles of the outcome distribution ( $p=0.1, 0.2, 0.3, 0.4, 0.5, 0.6, 0.7$ ), and corresponding 95% confidence intervals (question R3).
