# Supplementary material for: Comparison of two statistical indicators in communicating epidemiological results to the population: a randomized study in a high environmental risk area of Italy
Source: Springer Nature journal article supplement (doi:10.1186/s12889-019-7003-y), 2019-06-11
Supplement: MOESM9 [file 16797114]

Table A2. Ranking sexual gland cancer, thyroid cancer and lung cancer mortalities according to the degree of concern (from 1: high concern, to 3: low concern).

Causal effect of expressing the results in terms of TNH *versus* % excess (question R4), by education level and mathematical skills.

|                                               |                                                    | ACE<br>Mean<br>difference | 95% CI          | P     | PO % excess | 95% CI        |
|-----------------------------------------------|----------------------------------------------------|---------------------------|-----------------|-------|-------------|---------------|
| Low<br>mathematical<br>skills <sup>a</sup>    | Rank assigned to sexual<br>glands cancer mortality | -0.09                     | (-0.34 ; 0.15)  | 0.468 | 2.30        | (2.10 ; 2.50) |
|                                               | Rank assigned to thyroid<br>cancer mortality       | 0.20                      | (-0.16 ; 0.55)  | 0.276 | 2.27        | (1.96 ; 2.58) |
|                                               | Rank assigned to lung<br>cancer mortality          | -0.11                     | (-0.39 ; 0.18)  | 0.472 | 1.43        | (1.18 ; 1.68) |
| High<br>mathematical<br>skills <sup>a</sup>   | Rank assigned to sexual<br>glands cancer mortality | -0.17                     | (-0.34 ; 0.00)  | 0.057 | 2.26        | (2.15 ; 2.37) |
|                                               | Rank assigned to thyroid<br>cancer mortality       | 0.18                      | (0.00 ; 0.35)   | 0.048 | 2.23        | (2.10 ; 2.37) |
|                                               | Rank assigned to lung<br>cancer mortality          | -0.01                     | (-0.17 ; 0.16)  | 0.938 | 1.50        | (1.38 ; 1.62) |
| Intermediate<br>school<br>diploma or<br>lower | Rank assigned to sexual<br>glands cancer mortality | -0.05                     | (-0.28 ; 0.18)  | 0.667 | 2.19        | (2.04 ; 2.34) |
|                                               | Rank assigned to thyroid<br>cancer mortality       | 0.09                      | (-0.15 ; 0.33)  | 0.484 | 2.41        | (2.22 ; 2.59) |
|                                               | Rank assigned to lung<br>cancer mortality          | -0.04                     | (-0.27 ; 0.20)  | 0.759 | 1.40        | (1.24 ; 1.56) |
| High school<br>diploma or<br>higher           | Rank assigned to sexual<br>glands cancer mortality | -0.21                     | (-0.41 ; -0.01) | 0.039 | 2.28        | (2.16 ; 2.41) |
|                                               | Rank assigned to thyroid<br>cancer mortality       | 0.24                      | (0.04 ; 0.45)   | 0.018 | 2.16        | (2.01 ; 2.31) |
|                                               | Rank assigned to lung<br>cancer mortality          | -0.03                     | (-0.24 ; 0.17)  | 0.753 | 1.56        | (1.40 ; 1.71) |

<sup>a</sup> Low mathematical skills: No right answer at questions evaluating numerical skills; High mathematical skills: At least one right answer at questions evaluating numerical skills.

ACE: Average causal effect.

95% CI: 95% Confidence Interval.

p: p-value

PO % excess: Potential outcome under the % excess questionnaire.
